# Supplementary material for: DYF-5/MAK–dependent phosphorylation promotes ciliary tubulin unloading
Source: PubMed Central journal article supplement — Proc Natl Acad Sci U S A. 2022 Aug 15;119(34):e2207134119. doi: 10.1073/pnas.2207134119 (PMC9407615; doi:10.1073/pnas.2207134119), 2022-08-15
Supplement: pnas.2207134119.sapp.pdf [file pnas.2207134119.sapp.pdf]

## Supplementary Information for

### DYF-5/MAK-dependent phosphorylation promotes ciliary tubulin unloading.

Xuguang Jiang<sup>a,1</sup>, Wenxin Shao<sup>a,1</sup>, Yongping Chai<sup>a</sup>, Jingying Huang<sup>a</sup>, Mohamed A. A. Mohamed<sup>b</sup>, Zeynep Ökten<sup>b</sup>, Wei Li<sup>c</sup>, Zhiwen Zhu<sup>a,2</sup> and Guangshuo Ou<sup>a</sup>.

<sup>a</sup>Tsinghua-Peking Center for Life Sciences, Beijing Frontier Research Center for Biological Structure, School of Life Sciences and Ministry of Education Key Laboratory for Protein Science, Tsinghua University, Beijing 100084, China;

<sup>b</sup>Center for Protein Assemblies, Physics Department, E22, Technical University of Munich, 85748 Garching, Germany; and

<sup>c</sup>School of Life Sciences, Tsinghua University, Beijing 100084, China

<sup>1</sup>X.J. and W.S. contributed equally to this work

<sup>2</sup>To whom correspondence may be addressed. Email: zhiwenzhu@126.com

#### **This PDF file includes:**

Figures S1 to S3  
Table S1

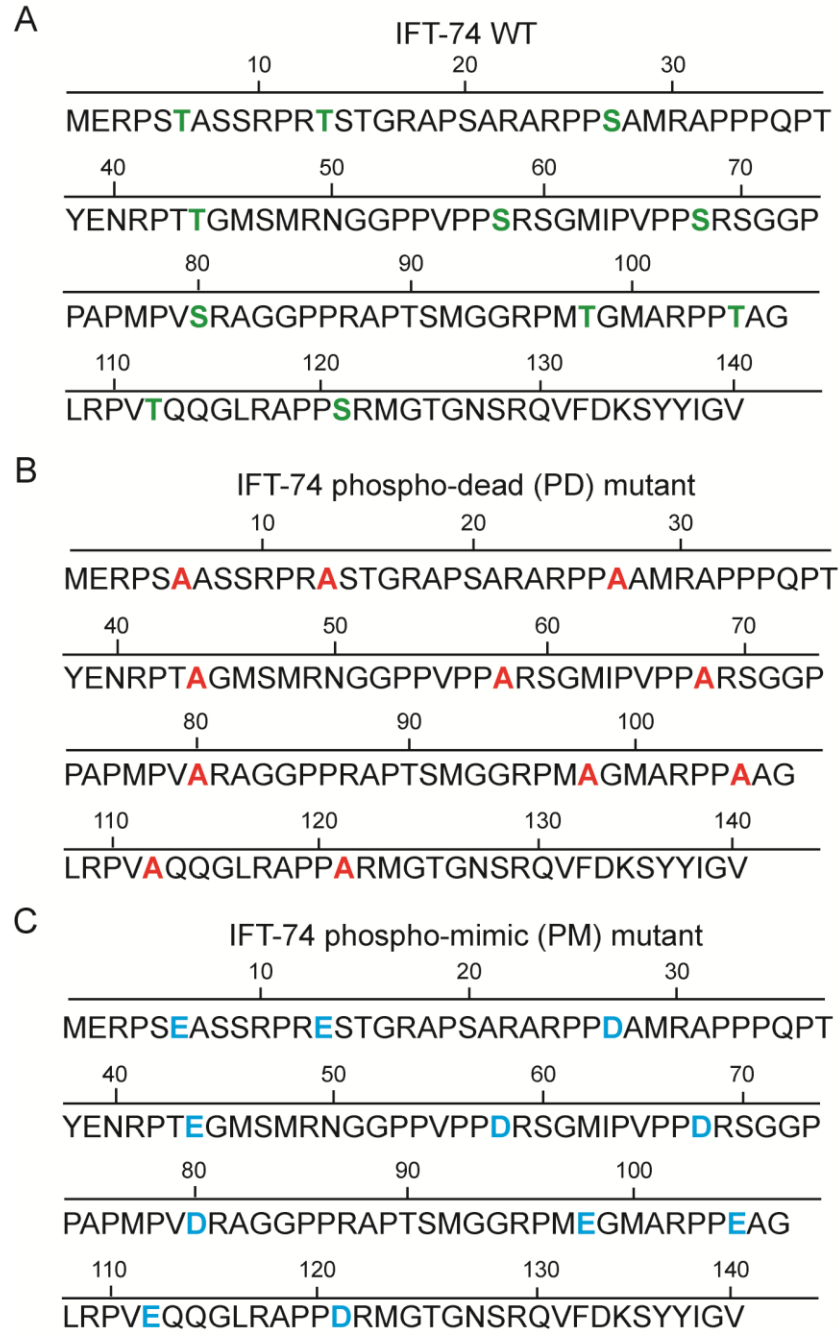

**Fig. S1. Amino acid mutations of in IFT-74 phospho-mimic (PM) and phospho-dead (PD) mutants.**

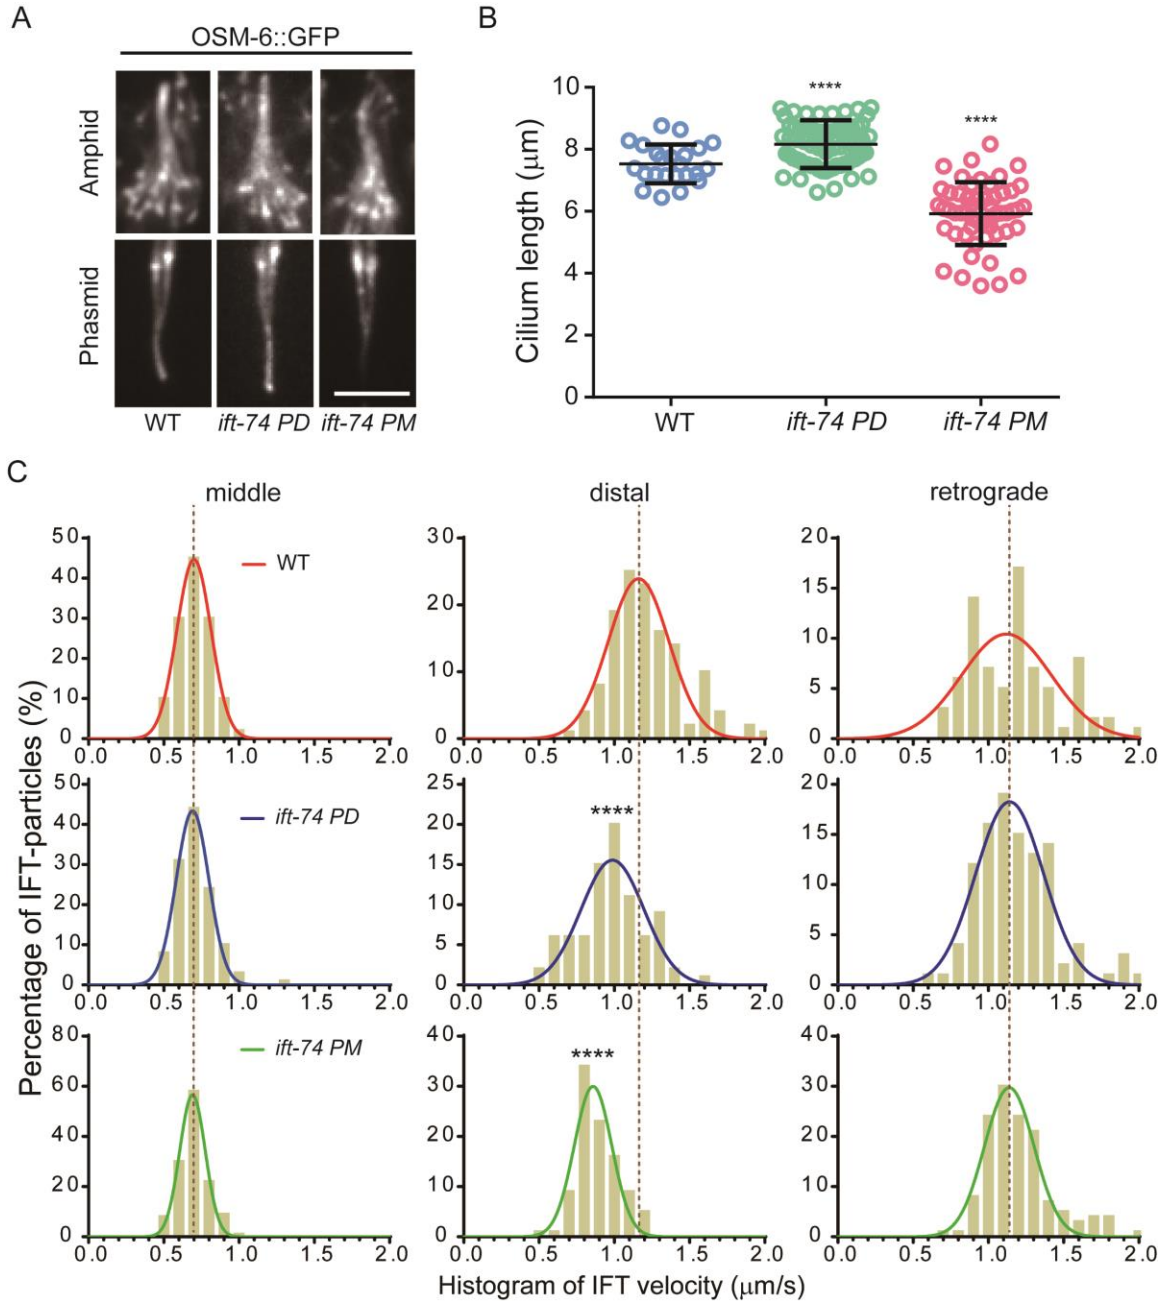

**Fig. S2. Cilium morphology and IFT velocity in *ift-74 PM* and *PD* mutant animals based on *OSM6::GFP*.** (A) Amphid (top) and phasmid (bottom) cilia morphology in *ift-74 PM* and *PD* mutants in comparison with wild-type (*N2*) animals. Cilia were imaged with GFP-tagged *OSM-6*. (B) Cilium length. Scale bar: 5  $\mu\text{m}$ . (B) Cilium length in wild-type and *ift-74 PM/PD* animals (mean  $\pm$  SD;  $n = 30$ ; \*\*\*\* $P < 0.0001$ ). *OSM-6::GFP* was used as the cilium marker. (C) Histogram of IFT velocities in wild-type and *ift-74*-mutant animals. Left: anterograde IFT along the middle segments. Middle: anterograde IFT along the distal segments. Right: retrograde IFT. *OSM-6::GFP* was used as the IFT marker for the measurement. Each plot was fit by a Gaussian distribution. Comparisons were performed between the wild-type and mutants. \*\*\*\* $P < 0.0001$ .

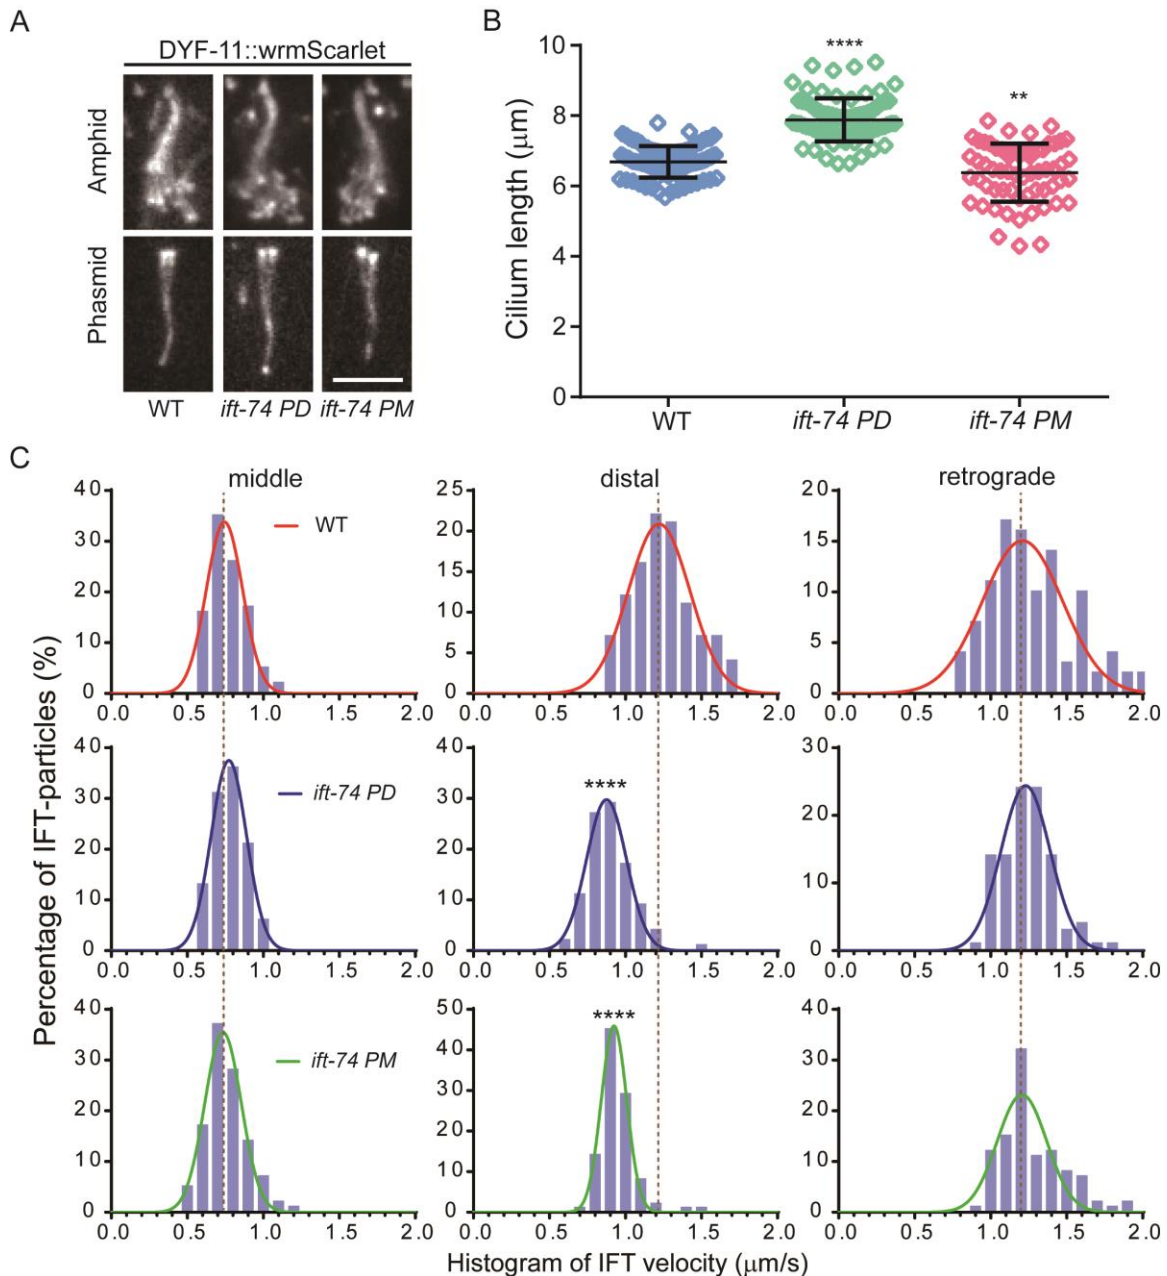

**Fig. S3. Cilium morphology and IFT velocity in *ift-74 PM* and *PD* mutant animals based on DYF-11::wrmScarlet.** (A) Amphid (top) and phasmid (bottom) cilia morphology in *ift-74 PM* and *PD* mutants in comparison with wild-type (N2). Cilia were imaged with wrmScarlet-tagged DYF-11. (B) Cilium length. Scale bar: 5  $\mu\text{m}$ . (B) Cilium length in wild-type and *ift-74 PM/PD* animals (mean  $\pm$  SD;  $n = 30$ ;  $**P < 0.01$ ,  $****P < 0.0001$ ). DYF-11::wrmScarlet was used as the cilium marker. (C) Histogram of IFT velocities in wild-type and *ift-74*-mutant animals. Left: anterograde IFT along the middle segments. Middle: anterograde IFT along the distal segments. Right: retrograde IFT. DYF-11::wrmScarlet was used as the IFT marker for the measurement. Each plot was fit by a Gaussian distribution. Comparisons were performed between the wild-type and mutants.  $****P < 0.0001$ .

**Table S1.** *C. elegans* strains used in this study

| Strain name | Genotype                                               | Method         | Resource     |
|-------------|--------------------------------------------------------|----------------|--------------|
| N2          | Wild type                                              | /              | CGC          |
| GOU2362     | <i>cas499 [ift-74::gfp knock-in]</i>                   | Microinjection | This study   |
| SP1745      | <i>dyf-5 (mn400)</i>                                   | /              | CGC          |
| GOU4775     | <i>dyf-5 (mn400); ift-74 (cas499)</i>                  | Genetic cross  | This study   |
| PHX4679     | <i>syb4679 [ift-74 PD knock-in]</i>                    | Microinjection | Suny Biotech |
| PHX4674     | <i>syb4674 [ift-74 PM knock-in]</i>                    | Microinjection | Suny Biotech |
| GOU4784     | <i>ift-74 (syb4679); mnIs17 [osm-6::gfp unc-36(+)]</i> | Genetic cross  | This study   |
| GOU4785     | <i>ift-74 (syb4674); mnIs17 [osm-6::gfp unc-36(+)]</i> | Genetic cross  | This study   |
| GOU4772     | <i>cas1086 [dyf-11::wrmScarlet knock-in]</i>           | Microinjection | This study   |
| GOU4786     | <i>ift-74 (syb4679); dyf-11 (cas1086)</i>              | Genetic cross  | This study   |
| GOU4787     | <i>ift-74 (syb4674); dyf-11 (cas1086)</i>              | Genetic cross  | This study   |
| PHX4963     | <i>syb4963 [ift-74 PD::gfp knock-in]</i>               | Microinjection | Suny Biotech |
| PHX4964     | <i>syb4964 [ift-74 PM::gfp knock-in]</i>               | Microinjection | Suny Biotech |
